# Supplementary material
Source: PubMed Central journal article supplement (PMC8867265)
Supplement: fetalneonatal-2021-322463supp002.pdf [file fetalneonatal-2021-322463supp002.pdf]

## **Text S2: Extended Results**

### **Study population characteristics**

Among the 60 mothers, 52 were diagnosed with a SARS-CoV-2 PCR test in nasopharyngeal swabs while 8 mothers were seropositive (IgG positive). Most PCR tests (38/52, 73.1%) were performed as part of routine surveillance before labor. Table S1 specifies when SARS-CoV-2 was diagnosed either by PCR or by serology.

### **Validation of SARS-CoV-2 RNA extraction and detection methods in breast milk**

To optimize SARS-CoV-2 viral RNA detection in breast milk samples, an initial analytical comparison aimed to determine the recovery of PEDV and MgV from spiked pre-pandemic breast milk samples using either a manual (MN) or an automated (Max) extraction method. Compared to spiked PBS, PEDV and MgV were recovered at 30 % (27-33 %) and 132 % (94-188 %) when extracted from whole milk samples with MN, respectively. Conversely, better recoveries (>100 %) were observed for both viruses extracted by Max. No significant inhibitions due the milk matrix were observed as depicted by the cycle threshold (Ct) values of 10-fold diluted RNA or RP gene reactions.

By spiking PEDV serial dilutions in milk samples, we further defined the detection ratios and limits of detection ( $LoD_{95\%}$  and  $LoD_{50\%}$ ), which are shown in Table S2. Results demonstrated similar sensibility of both extraction methods being 10 and 13 PEDV gc/100 $\mu$ L the limit of detection with 95 % confidence for MN and Max, respectively. These results suggest comparable analytical performances of MN and Max extraction methods for enveloped viruses.

**Table S1: Type of COVID-19 diagnosis (PCR/serology) and average time to sample collection**

| <b>COVID-19 diagnosis:</b>                                                   | <b>n=60</b>  |
|------------------------------------------------------------------------------|--------------|
| Positive nasopharyngeal PCR confirmation                                     | n=52         |
| confirmation 48 h before delivery                                            | 38           |
| confirmation 48 h after delivery                                             | 2            |
| confirmation > 48 h before delivery                                          | 9            |
| confirmation > 48 h after delivery                                           | 3            |
| Positive serology confirmation                                               | n=8          |
| confirmation 48 h before/after delivery                                      | 3            |
| confirmation > 48 h before delivery                                          | 1            |
| confirmation > 48 h after delivery                                           | 4            |
| <b>COVID-19 symptomatology</b>                                               |              |
| Symptomatic prior or at enrollment                                           | 22           |
| <b>Average time from COVID-19 diagnosis to breast milk sample collection</b> |              |
| Days post-PCR confirmation: median                                           | 15.0         |
| minimum and maximum                                                          | 1 - 206      |
| 25 <sup>th</sup> and 75 <sup>th</sup> percentile                             | 6.0 – 29.8   |
| Days post-serology confirmation: median                                      | 15.5         |
| minimum and maximum                                                          | 1 - 226      |
| 25 <sup>th</sup> and 75 <sup>th</sup> percentile                             | (2.0 – 40.5) |

**Table S2. Concentrations, detection ratios, and limits of detection (LoD<sub>95%</sub> and LoD<sub>50%</sub>) characterizing the analytical performances of a manual commercial kit (MN) and an automated assisted method (Max) to extract porcine epidemic diarrhoea virus (PEDV) spiked in breast milk**

| Levels of inoculated PEDV (gc/100uL) | MN                                            |                           |                               |                               | Max                                           |                           |                               |                               |
|--------------------------------------|-----------------------------------------------|---------------------------|-------------------------------|-------------------------------|-----------------------------------------------|---------------------------|-------------------------------|-------------------------------|
|                                      | Back calculated concentration (gc/100uL ± SD) | Detection ratio (+/total) | LoD <sub>95</sub> (gc/100 uL) | LoD <sub>50</sub> (gc/100 uL) | Back calculated concentration (gc/100uL ± SD) | Detection ratio (+/total) | LoD <sub>95</sub> (gc/100 uL) | LoD <sub>50</sub> (gc/100 uL) |
| 10e3                                 | 1348.84 ± 152.84                              | 6/6                       |                               |                               | 3137.92 ± 756.22                              | 6/6                       |                               |                               |
| 10e2                                 | 196.52 ± 10.10                                | 6/6                       |                               |                               | 575.86 ± 346.03                               | 6/6                       |                               |                               |
| 10e1                                 | 25.82 ± 5.03                                  | 6/6                       | 10.0                          | 2.96                          | 92.94 ± 44.48                                 | 6/6                       | 13.38                         | 3.10                          |
| 10e0                                 | 2.05 ± 0.25                                   | 2/6                       |                               |                               | 16.39 ± 4.45                                  | 3/6                       |                               |                               |
| 10e-1                                | -                                             | 0/6                       |                               |                               | -                                             | 0/6                       |                               |                               |
